# Supplementary material for: Ecosystem connections in the shelf sea environment using complex networks
Source: Copernicus journal article supplement (doi:10.5194/egusphere-2023-475), 2023-04-17

# Supplementary Material: Ecosystem connections in the shelf sea environment using complex networks

Figure S1

A set of box plots for key indicator variables, describing the distribution of unprocessed model output values across the entire time series of each region (A-M) shown in Fig.7 of the main text.

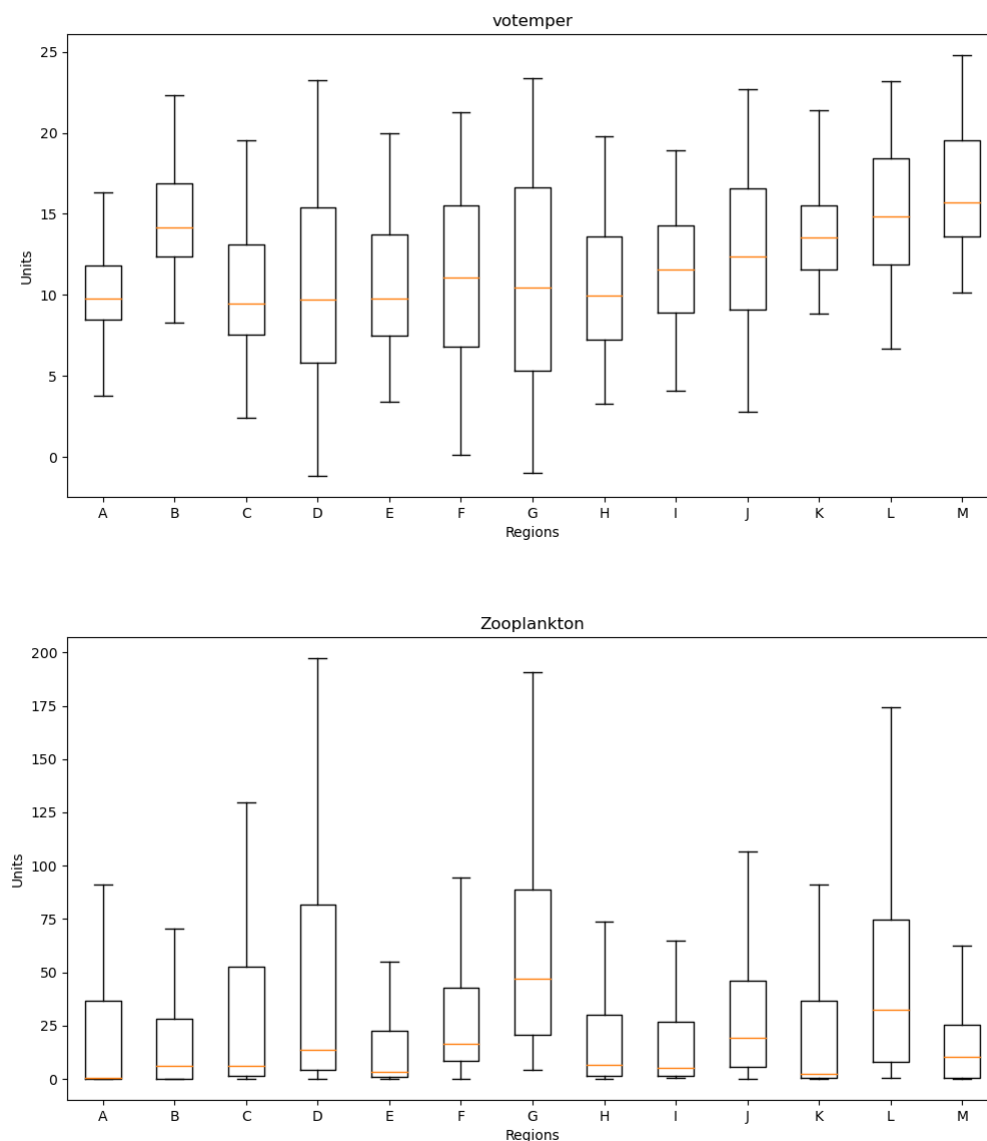

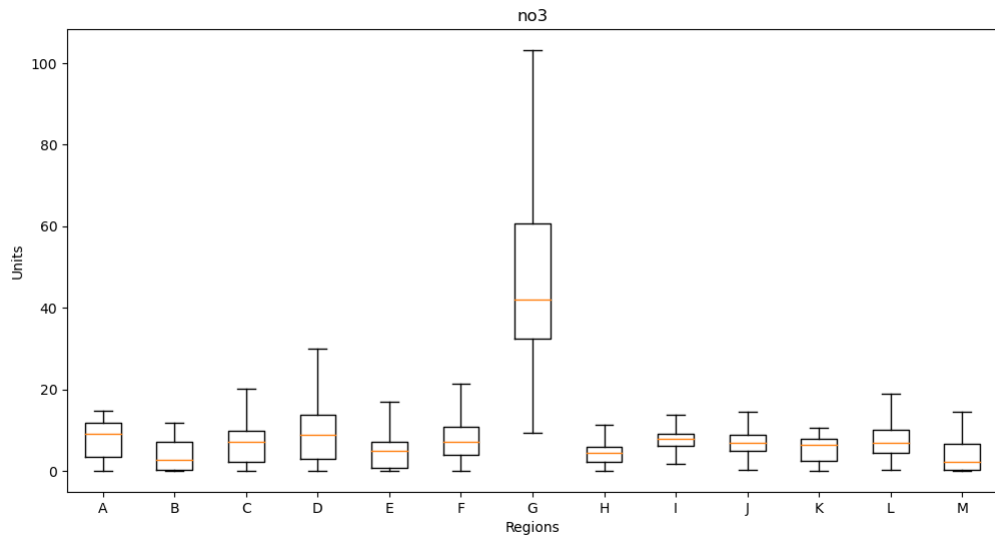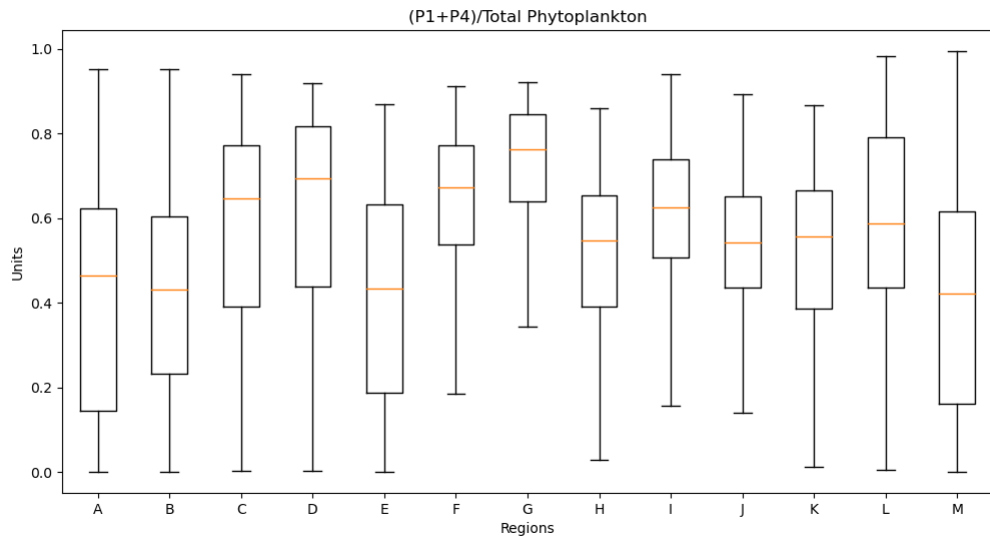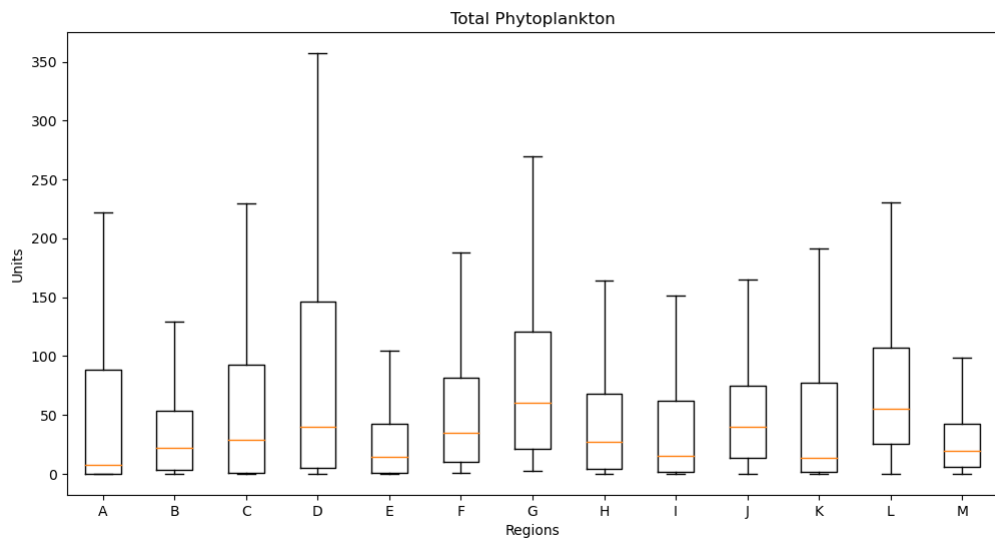

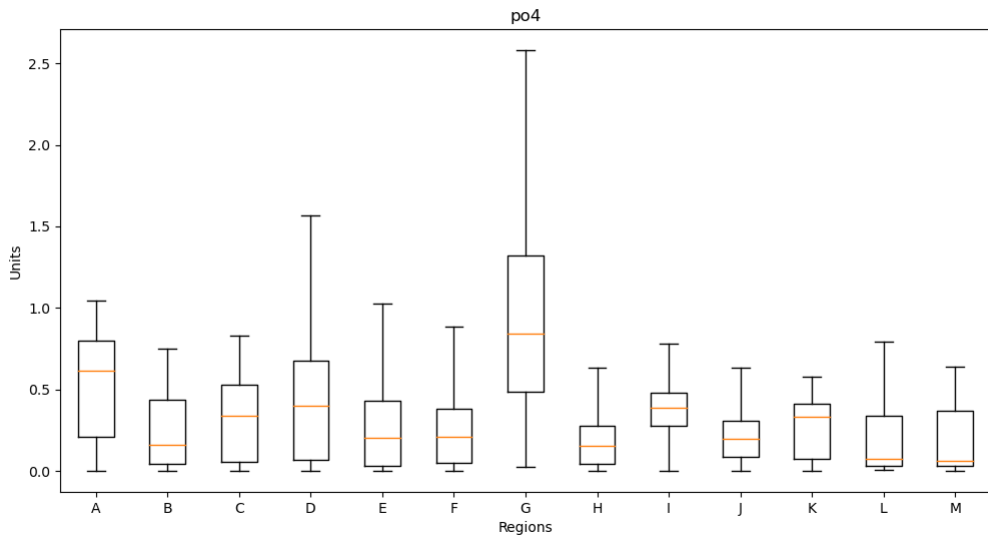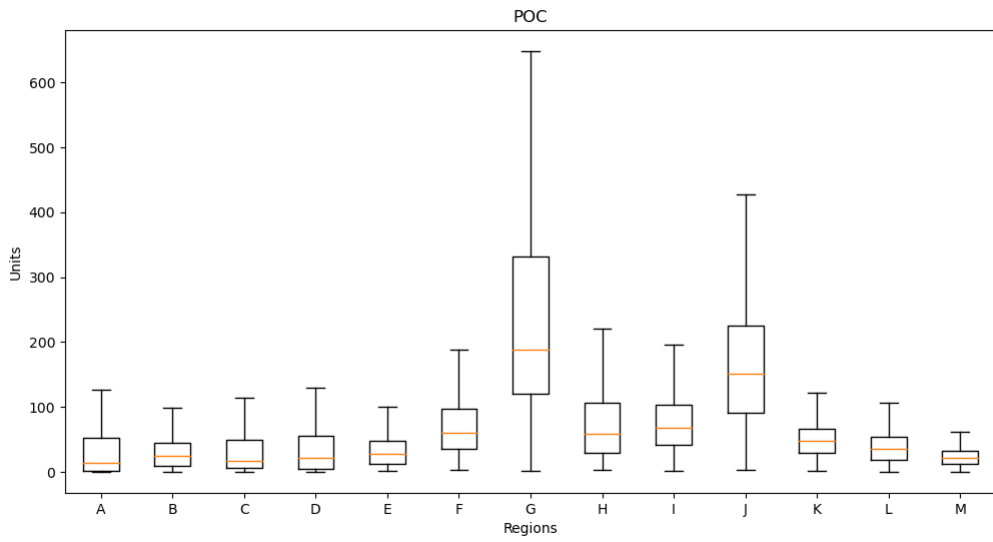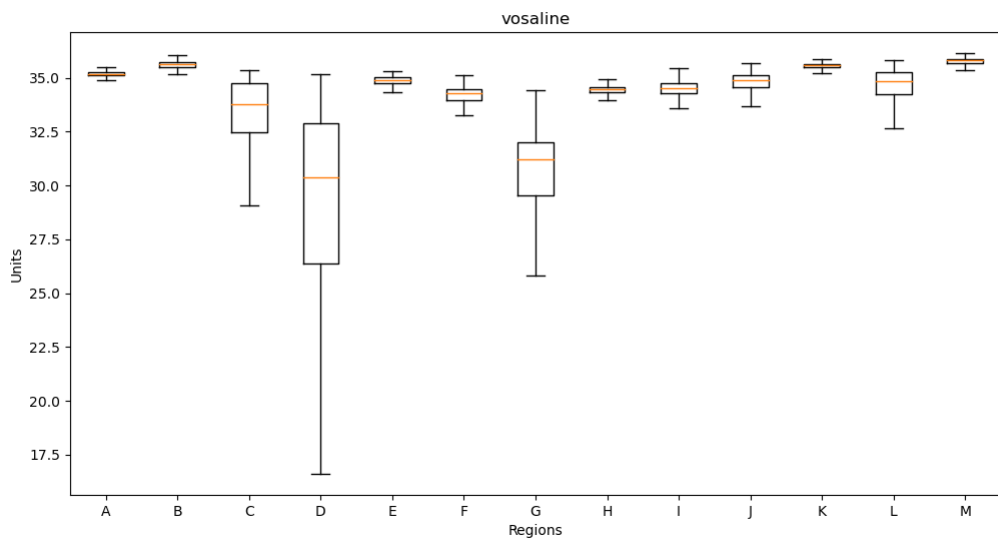

Supplement: Supplementary file 1 [file egusphere-2023-475-supplement.pdf]
